# Supplementary material for: Natural selection and sympatric divergence in the apple maggot Rhagoletis pomonella
Source: Springer Nature journal article supplement (doi:10.1038/35037578), 2000-10-01

**Figure 1. Summary of *R. pomonella* Life-Cycle highlighting how the difference in Fruiting Phenology between Apples and Haws affects Fly Races. Dates given are the means for Grant, Michigan Site in 1991.**

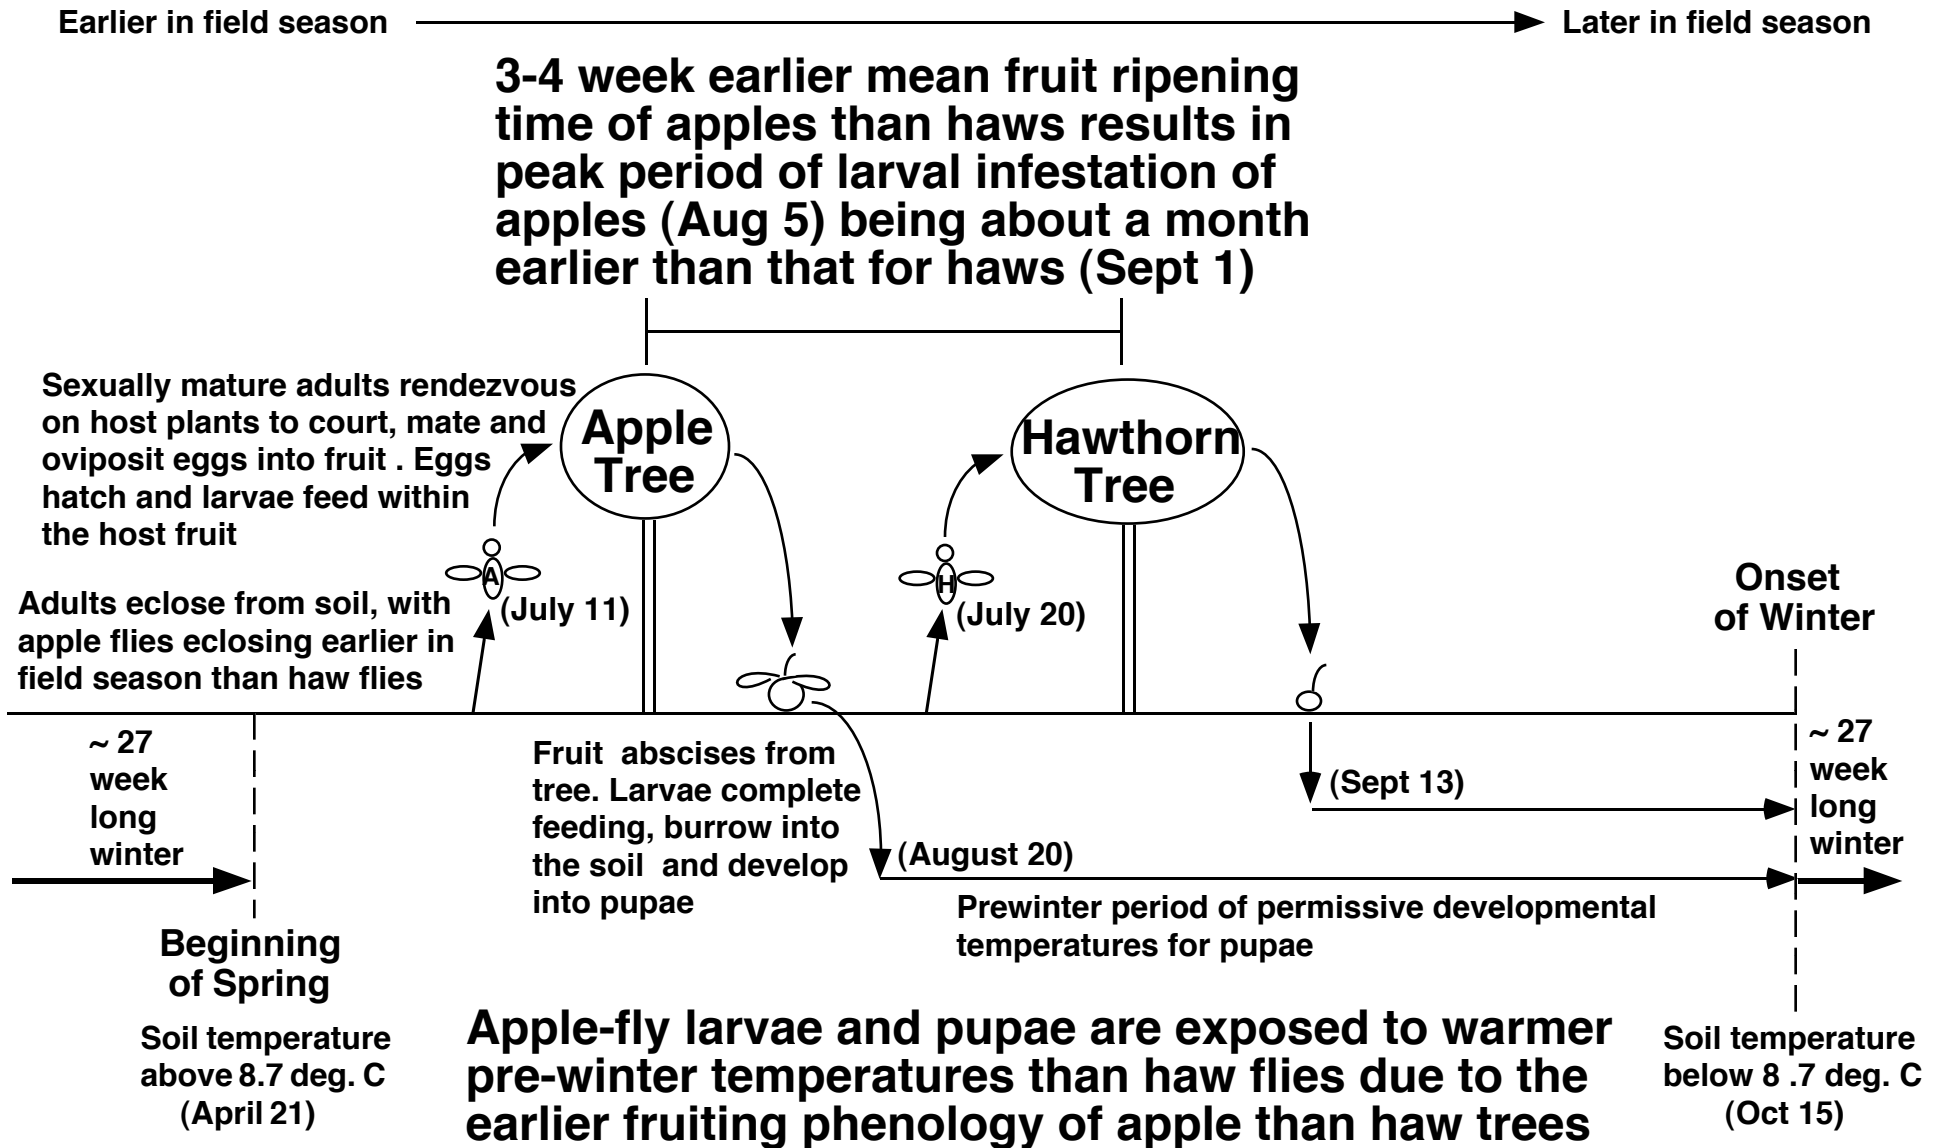

Supplement: 41586_2000_BF35037578_MOESM1_ESM.pdf [file 41586_2000_BF35037578_MOESM1_ESM.pdf]
