# Supplementary figures and images for: Natural selection and sympatric divergence in the apple maggot Rhagoletis pomonella
Source: Springer Nature journal article supplement (doi:10.1038/35037578), 2000-10-01

**Figure 2.**

**Proportion of Flies Surviving different Treatments in the Rearing Experiment**

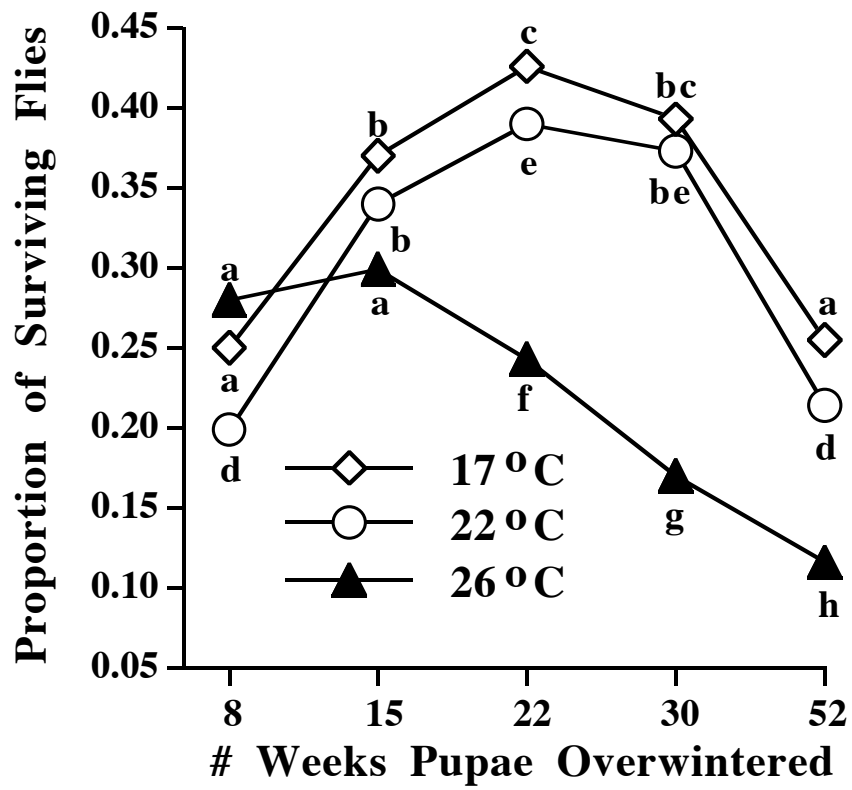

Supplement: 41586_2000_BF35037578_MOESM2_ESM.pdf [file 41586_2000_BF35037578_MOESM2_ESM.pdf]

**Figure 3.**

**Comparison of Genetic Responses between  
17 and 22 Deg. C Prewinter Treatments**

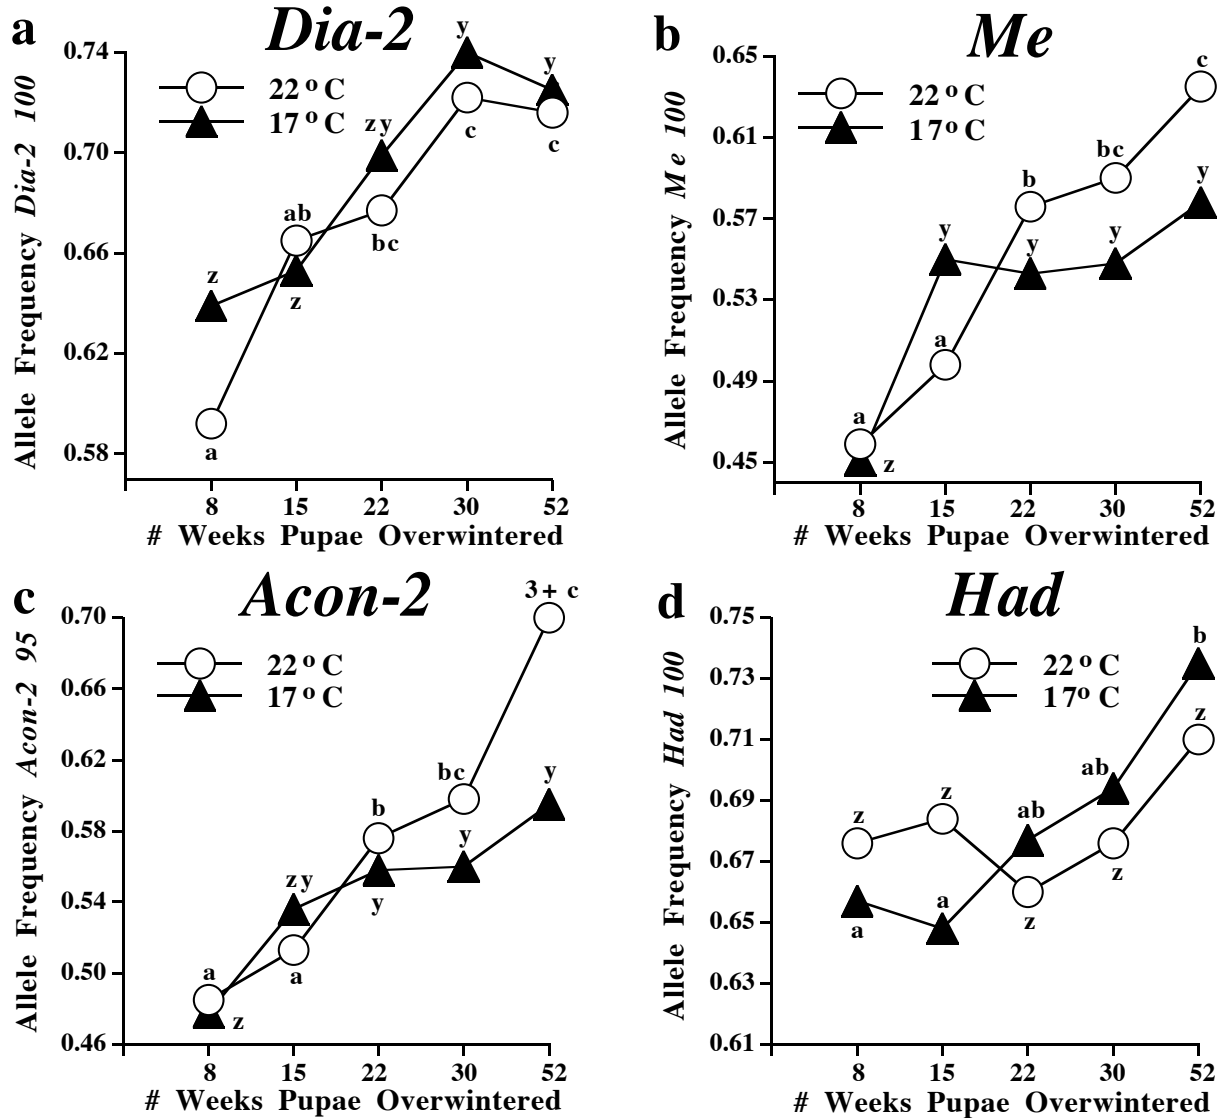

Supplement: 41586_2000_BF35037578_MOESM3_ESM.pdf [file 41586_2000_BF35037578_MOESM3_ESM.pdf]

Figure 4.

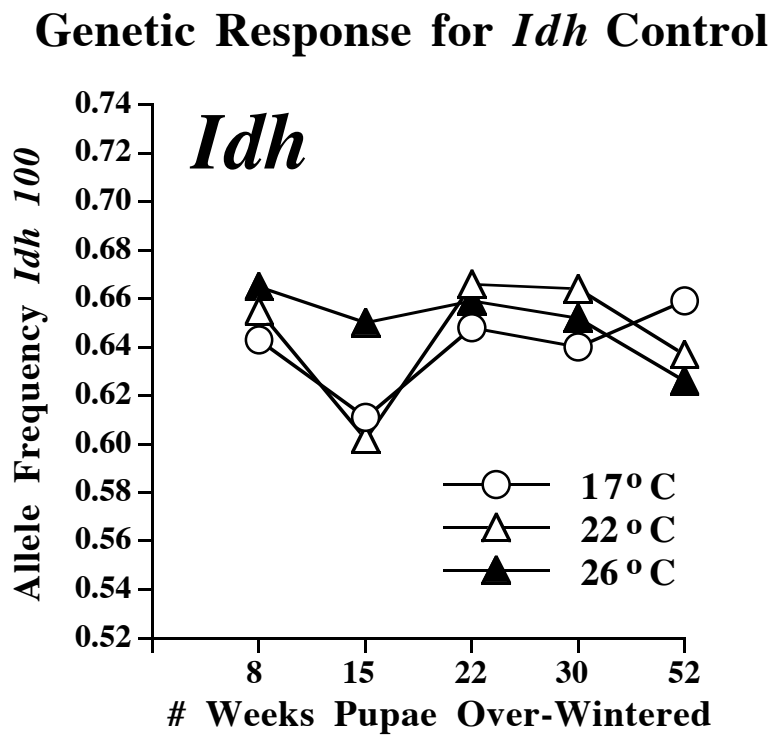

Supplement: 41586_2000_BF35037578_MOESM4_ESM.pdf [file 41586_2000_BF35037578_MOESM4_ESM.pdf]
